# Supplementary material for: Effect of chemotherapy on the microbiota and metabolome of human milk, a case report
Source: PubMed Central journal article supplement (PMC4109383; doi:10.1186/2049-2618-2-24), 2014-07-11

**DHA**

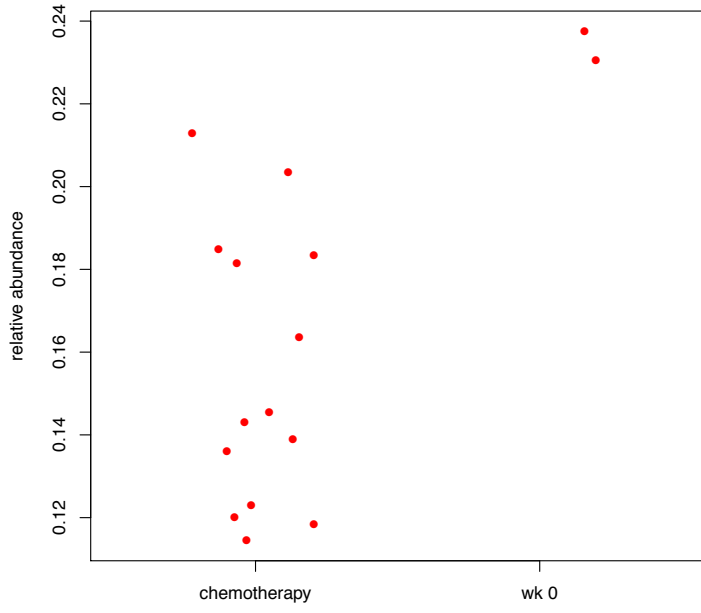

**inositol**

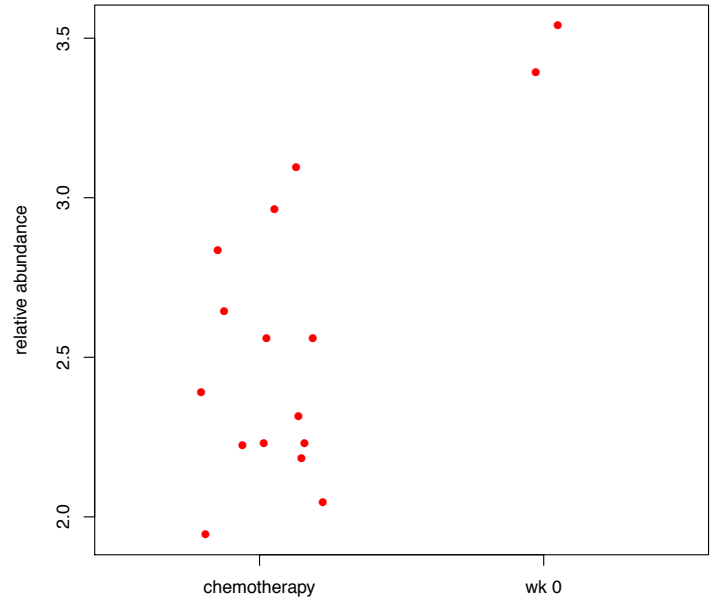

**palmitic acid**

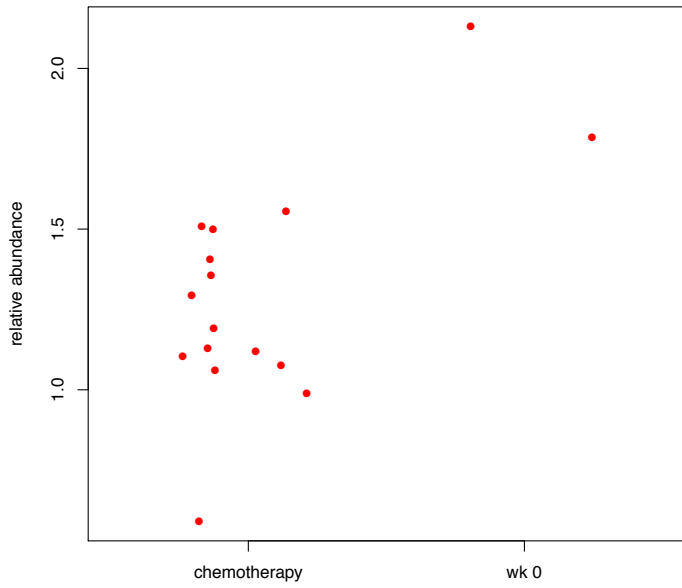

Supplement: 2049-2618-2-24-S6.pdf [file 2049-2618-2-24-S6.pdf]
